# Supplementary material for: Lavender Decline in France Is Associated with Chronic Infection by Lavender-Specific Strains of “Candidatus Phytoplasma solani”
Source: PubMed Central journal article supplement (PMC6275342; doi:10.1128/aem.01507-18), 2018-11-30
Supplement: zam023188881s1.pdf [file zam023188881s1.pdf]

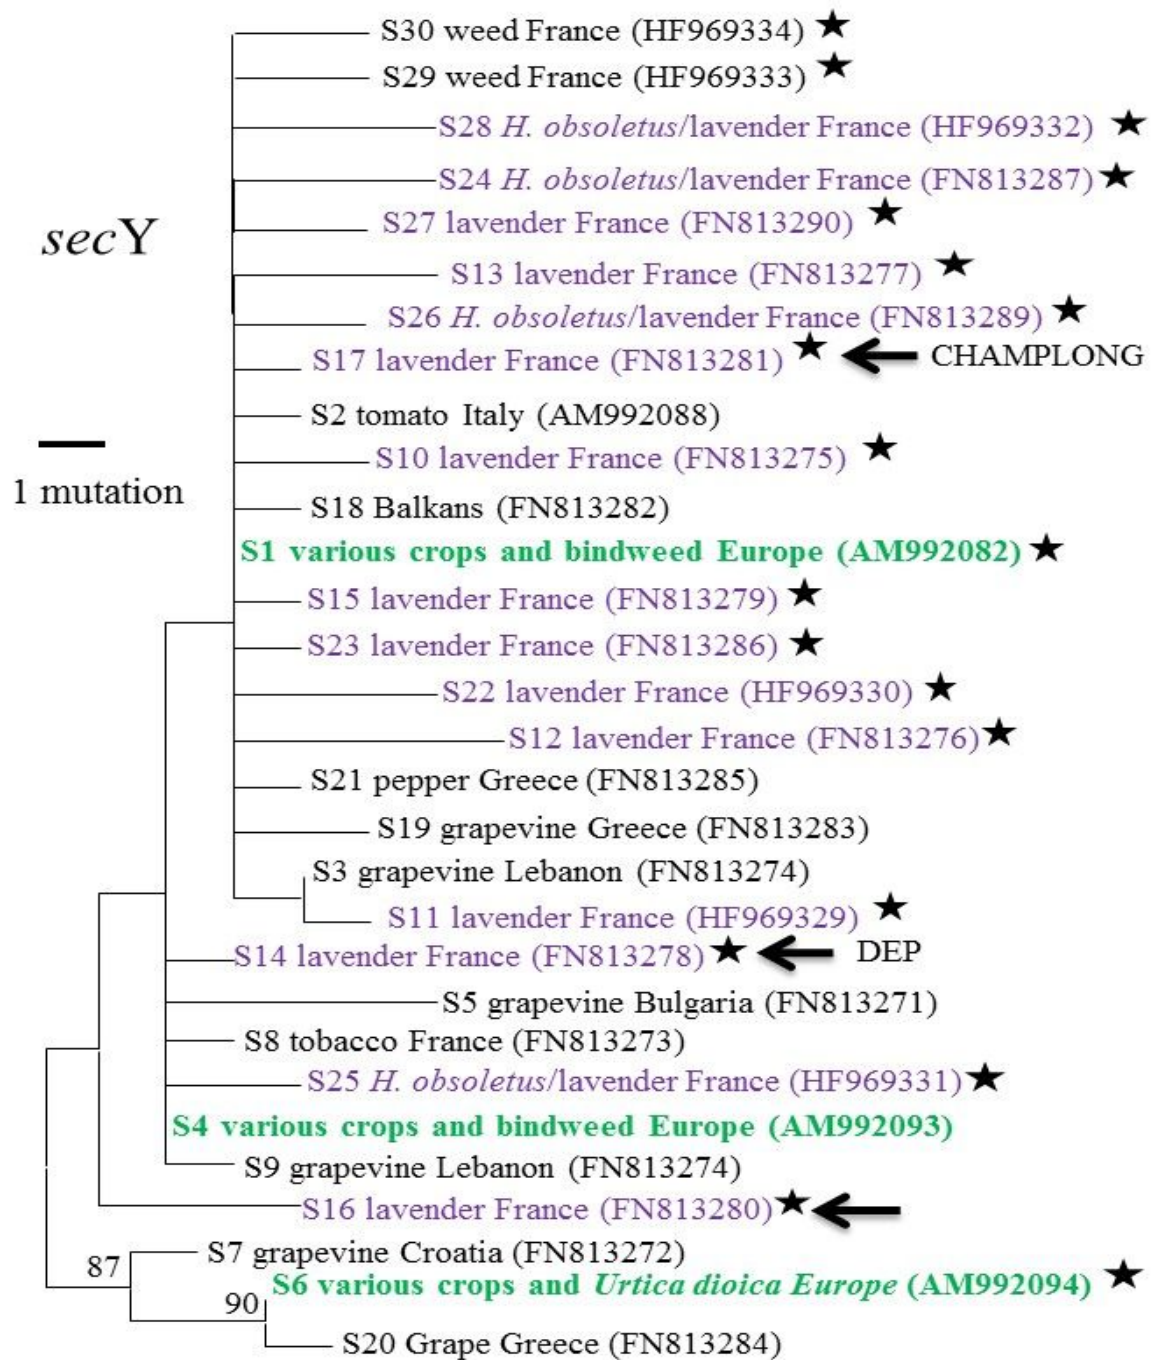

**FIG S1 Genetic characterization of "Candidatus Phytoplasma solani" strains detected in lavender fields.** (A) Maximum Parsimony analysis of "Candidatus Phytoplasma solani" *secY* genes from declining lavenders and *Hyalesthes obsoletus* collected in declining lavender fields. One of the 10 parsimonious trees is shown. The percentage of replicate trees in which the associated taxa clustered together in the bootstrap test (250 replicates) are shown next to the branches. All positions containing gaps and missing data were eliminated. There were a total of 727 positions in the final dataset. Sequences colored in green correspond to the 3 most abundant genotypes found in Europe and the 17 sequences detected in lavender fields are highlighted in with stars and those detected in lavender are colored in purple. 'Ca. P. solani' reference strains DEP and CHAMPLONG originating from lavender and maintained in Madagascar periwinkle are indicated by arrows. Accession numbers are indicated between brackets

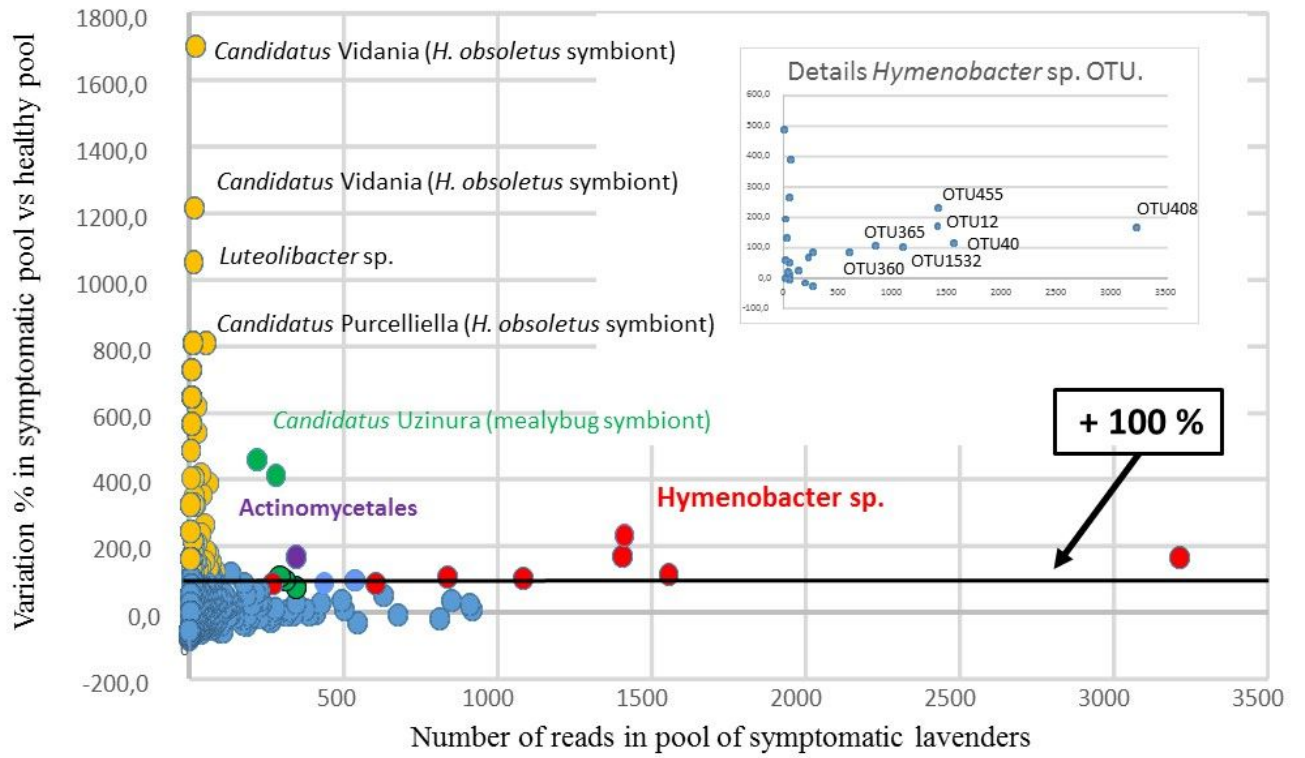

**FIG S2** Relative variation of bacterial OTUs prevalence in phytolasma-free declining lavenders versus healthy lavenders.

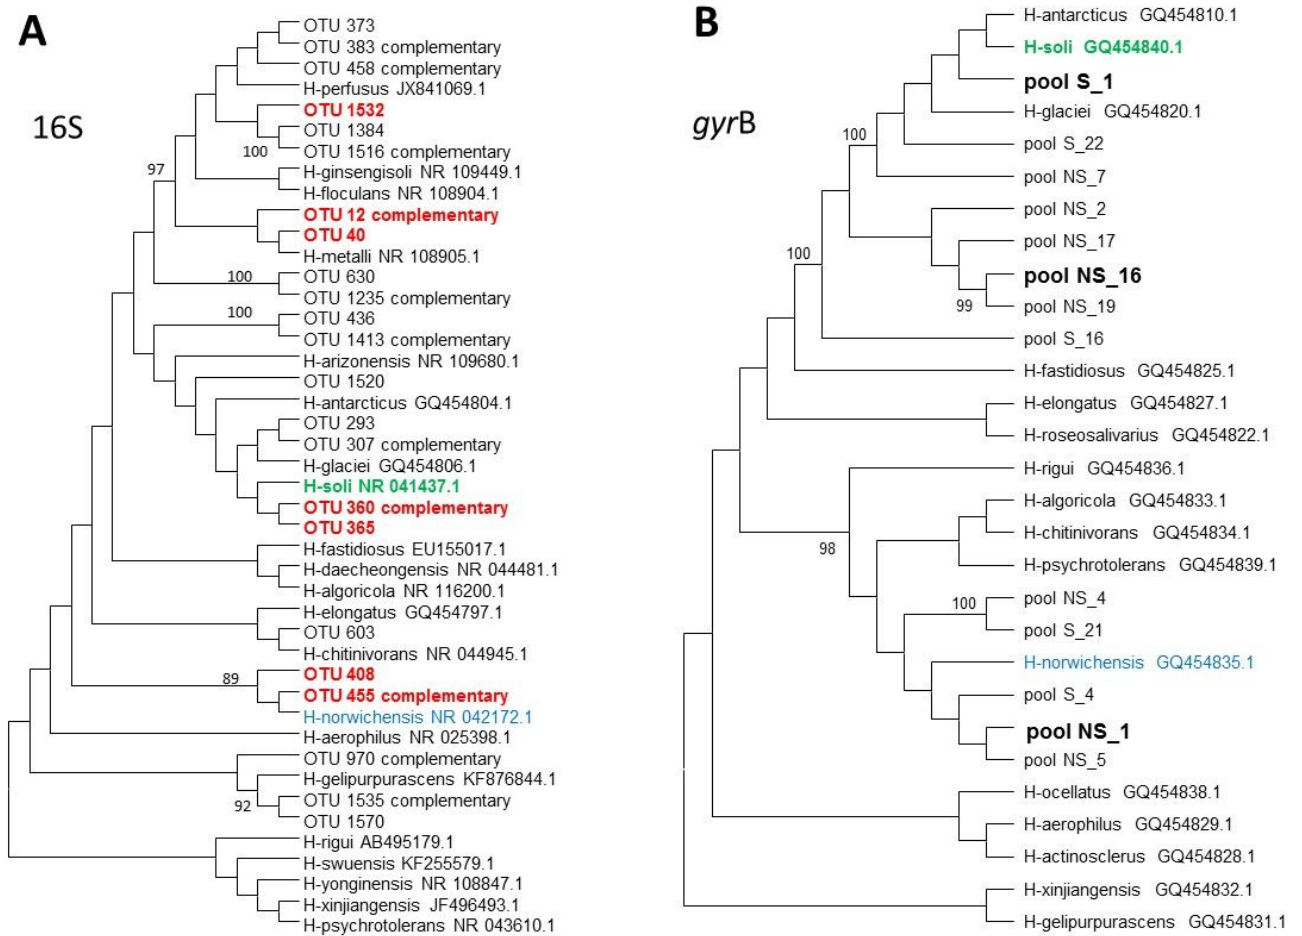

**FIG S3 Maximum parsimony phylogenetic analyses using of V4V5 regions of *Hymenobacter* sp. OTU (16S rRNA) and *gyrB* sequences present in lavenders negative for ‘*Ca. P. solani*’.** Consensus trees built from: **A:** Phylogenetic analysis of bacterial 16S OTU homologous to genus *Hymenobacter* 16S rRNA sequences detected in declining and healthy lavenders with *Hymenobacter* sp. 16S rRNA sequences available in Genbank. OTU sequences labelled in red correspond to the most represented OTUs (see Fig 6). **B:** Phylogenetic analysis of *gyrB* sequences cloned from *gyrB* amplicons amplified from pools of nucleic acids. *GyrB* clones from declining lavenders are noted S and from healthy lavenders are noted NS. The three sequences in bold characters correspond to the insert of the three plasmid clones that served in equal mixture as quantitative standards (see Fig. S4). The percentage of replicate trees in which the associated taxa clustered together in the bootstrap test (250 replicates) are shown next to the branches.

**A**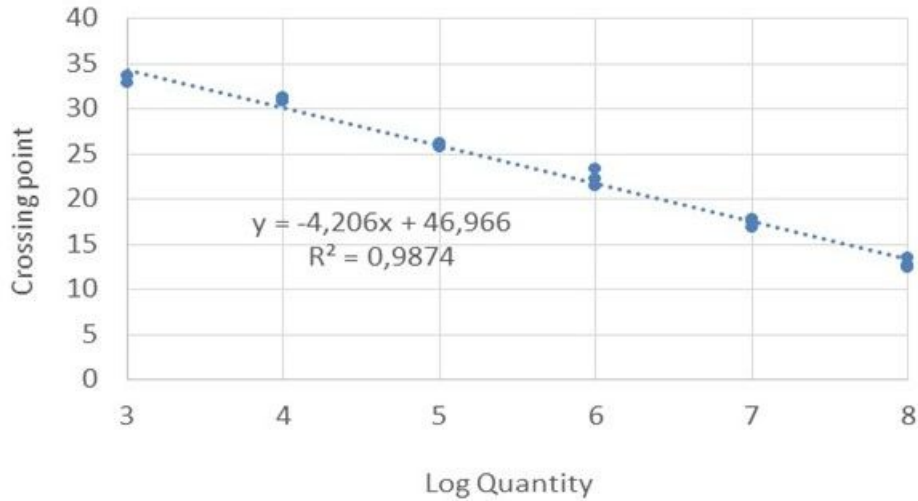**B**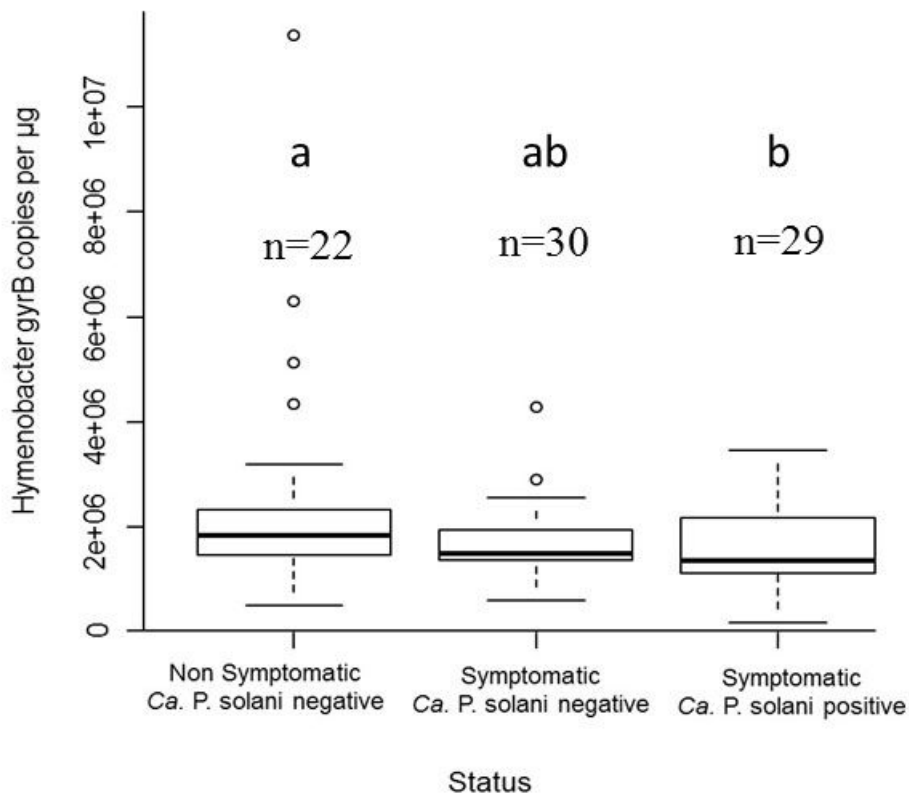

**FIG S4: Quantification of *Hymenobacter* in lavenders.** **A:** Calibration curve obtained after 10 fold dilution series of equal mixture of the three plasmids S\_1, NS\_1 and NS\_16 representative of representative of *gyrB* genetic diversity in French lavenders. **B.** Detection of *gyrB* copy numbers in DNA of healthy or declining lavenders negative for "*Ca. P. solani*" detection and in DNA of "*Ca. P. solani*"-positive declining lavenders. Letters **a** and **b** indicate groups statistically different in ANOVA. N is the number of individual lavender DNA extracts tested.

Supplementary table S1: Prevalence of "*Ca. P. solani*" in *L. angustifolia* and *L. intermedia* in nurseries during the 2008-2010 period.

| Type of nursery                                                                | Number of nurseries surveyed | " <i>Ca. P. solani</i> " PCR positive/total tested (% of positives) | Number of infected nurseries |
|--------------------------------------------------------------------------------|------------------------------|---------------------------------------------------------------------|------------------------------|
| Certified grand-mother stocks grown under insect-proof tunnels                 | 1                            | 0/597                                                               | 0                            |
| Certified mother stocks and planting material grown under insect-proof tunnels | 10                           | 4/574                                                               | 1                            |
| Certified <i>L. intermedia</i> Grosso grown in open fields                     | 6                            | 11/1269                                                             | 1                            |
| Non certified planting material grown in open fields                           | 5                            | 59/616                                                              | 5                            |

Supplementary table S2: Incidence of "*Ca. P. solani*" positive plants in declining plants at spring and autumn 2010 among plants previously tested negative

| Season of testing – season of previous negative test | <i>L. intermedia</i> <sup>5</sup> PCR positive/tested (% of positive) | <i>L. angustifolia</i> <sup>6</sup> PCR positive/tested (% of positive) |
|------------------------------------------------------|-----------------------------------------------------------------------|-------------------------------------------------------------------------|
| Spring 2010 – autumn 2008 <sup>1</sup>               | 11/96 (11.5%)                                                         | 9/63 (14.3%)                                                            |
| Spring 2010 – spring 2008 <sup>2</sup>               | 17/91 (18.7%)                                                         | 22/50 (44%)                                                             |
| Autumn 2010 – autumn 2009 <sup>3</sup>               | 18/58 (31%)                                                           | 11/30 (36.7%)                                                           |
| Autumn 2010 – spring 2009 <sup>4</sup>               | 28/78 (35.9%)                                                         | 16/34 (47%)                                                             |

<sup>1</sup> plants exposed during summer 2009 after negative test, <sup>2</sup> plants exposed during summers 2008 and 2009 after negative test, <sup>3</sup> plants exposed during summer 2010 after negative test, <sup>4</sup> plants exposed during summers 2009 and 2010 after negative test

<sup>5</sup> collected in the 10 fields GS, GD, SB, GC, SP, AS, GM, AA, SS and RS

<sup>6</sup> collected in the 6 fields RM, BL, RJ, RT, MTF and PPi

Supplementary table S3: Distribution of "*Ca. P. solani*" *secY* genotypes in lavender fields

| Field | Number of plant infected by the <i>secY</i> genotype |    |    |     |     |     |     |     |     |     |     |     |     |     |     |  |
|-------|------------------------------------------------------|----|----|-----|-----|-----|-----|-----|-----|-----|-----|-----|-----|-----|-----|--|
|       | S1                                                   | S4 | S6 | S10 | S11 | S12 | S13 | S14 | S15 | S16 | S17 | S22 | S23 | S27 | S28 |  |
| GS    | 2                                                    |    | 1  |     |     |     |     | 1   |     | 2   | 1   | 1   |     |     |     |  |
| AS    | 2                                                    |    |    | 1   | 1   | 1   |     | 2   |     | 1   | 14  |     |     |     |     |  |
| CC    |                                                      |    |    |     |     |     | 1   | 3   | 1   |     | 5   |     | 1   |     |     |  |
| RJ    |                                                      | 1  | 1  |     |     |     |     | 2   |     | 7   | 6   |     |     |     |     |  |
| RS    |                                                      |    |    |     |     |     |     |     |     |     | 1   |     |     |     |     |  |
| MTF   | 1                                                    |    |    |     |     |     |     |     |     | 1   | 1   |     |     |     |     |  |
| RT    | 1                                                    |    |    |     |     |     |     | 8   |     | 4   | 8   |     |     | 1   |     |  |
| BL    |                                                      |    |    |     |     |     |     | 4   |     | 1   | 14  |     |     |     |     |  |
| RM    |                                                      |    |    |     |     |     |     | 1   |     | 2   | 18  |     |     |     |     |  |
| GC    |                                                      |    |    |     |     |     |     | 1   |     |     | 8   |     |     |     |     |  |
| SP    |                                                      | 1  |    |     |     |     |     |     |     |     | 4   |     |     |     |     |  |
| GM    |                                                      |    |    |     |     |     |     |     |     |     | 6   |     |     |     |     |  |
| SS    |                                                      |    |    |     |     |     |     |     |     | 6   | 7   |     |     |     |     |  |
| PPi   |                                                      | 2  |    |     |     |     |     | 2   |     | 1   | 4   |     |     |     |     |  |
| PP    |                                                      |    |    |     |     |     |     | 1   |     | 1   | 8   |     |     |     |     |  |
| AA    |                                                      |    |    |     |     |     |     | 12  |     | 2   | 5   |     |     |     | 1   |  |
| MTF   |                                                      |    |    |     |     |     |     | 2   |     | 4   | 1   |     |     |     |     |  |
| SB    |                                                      |    |    |     |     |     |     | 3   |     |     | 10  |     |     |     |     |  |
| SL    |                                                      |    |    |     |     |     |     |     |     |     | 6   |     |     |     |     |  |
| BJ    | 1                                                    |    |    |     |     |     |     | 2   |     | 6   | 6   |     |     |     |     |  |
| PF    |                                                      |    |    |     |     |     |     | 1   |     |     | 6   |     |     |     |     |  |
| CS    |                                                      |    |    |     |     |     |     |     |     | 1   | 5   |     |     |     |     |  |

Supplementary table S4: multilocus genotypes of "*Ca. P. solani*" isolates detected in lavenders and reference strains propagated in *C. roseus* periwinkle.

| Isolates code or strain name | host                                 | <i>tuf</i> | <i>secY</i> | <i>vmp1</i> | <i>stamp</i> |
|------------------------------|--------------------------------------|------------|-------------|-------------|--------------|
| L2262                        | <i>Lavandula intermedia</i> cv Super | tuf-b1     | S17         | V4          | ST20         |
| L2275                        | <i>L. angustifolia</i> cv Fine       | tuf-b1     | S17         | V4          | ST20         |
| L3981                        | <i>L. angustifolia</i> population    | tuf-b1     | S17         | V4          | ST20         |
| L2664                        | <i>L. intermedia</i> cv Abrial       | tuf-b1     | S17         | V4          | ST20         |
| CHAMPLONG                    | <i>Catharanthus roseus</i>           | tuf-b1     | S17         | V4          | ST20         |
| L3991                        | <i>L. angustifolia</i> population    | tuf-b2     | S14         | V1          | ST10         |
| L2674                        | <i>L. intermedia</i> cv Abrial       | tuf-b2     | S14         | V1          | ST10         |
| DEP                          | <i>C. roseus</i>                     | tuf-b2     | S14         | V1          | ST10         |
| L2667                        | <i>L. intermedia</i> cv Abrial       | tuf-b1     | S16         | V4          | ST5          |
| L4222                        | <i>L. intermedia</i> cv Sumian       | tuf-b1     | S16         | V4          | ST5          |

Supplementary table S5: results of "*Ca. P. solani*" real-time PCR and *secY* genotypes detected on weeds collected in the surroundings of lavender fields

| Year | Fields                                                      | positive weeds/ total tested | <i>secY</i> genotype detected (Plant) <sup>1</sup>                                                                                                                                                                          |
|------|-------------------------------------------------------------|------------------------------|-----------------------------------------------------------------------------------------------------------------------------------------------------------------------------------------------------------------------------|
| 2008 | RS, SP, AS, RJ, AA, PPi, MTF, RT, GM, SS, GS                | 17/117                       | S29 (1 unidentified)<br>S30 (1 unidentified)<br>S4 (1 <i>Daucus carota</i> wild carrot)<br>2 S1 (1 <i>Rubus fruticosus</i> blackberry, 1 <i>Convolvulus siculus</i> )<br>S17 (1 <i>Convolvulus arvensis</i> field bindweed) |
| 2009 | BJ, RJ, SP, SL, PPi, GS, SS, AA, RT, PF, AF, GF, GG, AS     | 9/39                         | 2 S1 (2 <i>C. arvensis</i> field bindweeds)<br>3 S4 (2 <i>C. arvensis</i> field bindweeds, 1 wild lavender)                                                                                                                 |
| 2010 | RM, CS, BL, GG, PPi, GM, SL, BJ, SS, RJ, AF, GF, AA, RS, PF | 16/89                        | 2 S1 (2 <i>C. arvensis</i> field bindweeds)<br>S4 (1 <i>C. arvensis</i> field bindweed)                                                                                                                                     |

<sup>1</sup>28 samples gave a real-time PCR Ct value higher than 35 and did not give amplification with the *secY* nested-PCR assay

Supplementary table S6: Sequences used for *stamp* phylogenetic analyses

| Country                         | Isolate               | Biological origins                                                                                                                       | Accession number      | Reference                           |
|---------------------------------|-----------------------|------------------------------------------------------------------------------------------------------------------------------------------|-----------------------|-------------------------------------|
| France                          | L2667-S16             | <i>Lavandula intermedia</i><br>cv. Abrial                                                                                                | PRJEB25879            | Present publication                 |
| France                          | L4222-S16             | <i>L. intermedia</i> cv. Sumian                                                                                                          | PRJEB25879            | Present publication                 |
| France                          | L2674-S14             | <i>L. intermedia</i> cv. Abrial                                                                                                          | PRJEB25879            | Present publication                 |
| France                          | L3991-S14             | <i>L. angustifolia</i> Fine<br>population                                                                                                | PRJEB25879            | Present publication                 |
| France                          | L4009-S14             | <i>L. intermedia</i> cv. Abrial                                                                                                          | PRJEB25879            | Present publication                 |
| France                          | L4300-S14             | <i>L. angustifolia</i> Fine<br>population                                                                                                | PRJEB25879            | Present publication                 |
| France                          | DEP-S14               | <i>Catharanthus roseus</i><br>inoculated from <i>L.</i><br><i>intermedia</i> cv. Abrial by<br><i>Cuscuta campestris</i>                  | PRJEB25879            | (1)                                 |
| France                          | L2262-S17             | <i>L. intermedia</i> cv. Super                                                                                                           | PRJEB25879            | Present publication                 |
| France                          | CHAMPLONG-S17         | <i>C. roseus</i> inoculated by<br><i>Hyalesthes obsoletus</i><br>collected on <i>Lavandula</i><br><i>angustifolia</i> Fine<br>population | PRJEB25879            | Present publication                 |
| France                          | L2275-S17             | <i>L. angustifolia</i> Fine<br>population                                                                                                | PRJEB25879            | Present publication                 |
| France                          | L3981-S17             | <i>L. angustifolia</i> Bleue<br>population                                                                                               | PRJEB25879            | Present publication                 |
| Germany                         | 19-25                 | <i>C. campestris</i> inoculated<br><i>C. roseus</i> from <i>V.</i><br><i>vinifera</i>                                                    | FN813267              | (2)                                 |
| Bulgaria                        | BG4560                | <i>V. vinifera</i>                                                                                                                       | FN813252              | (2)                                 |
| Bulgaria                        | BG-2009-5899          | <i>V. vinifera</i>                                                                                                                       | Identical<br>KC703019 | Foissac and Avramov,<br>unpublished |
| Serbia                          | STOL                  | <i>C. campestris</i> inoculated<br><i>C. roseus</i> from <i>Capsicum</i><br><i>annuum</i>                                                | FN813261              | (2)                                 |
| Germany,<br>Switzerland, France | HO-Ud-S1              | <i>Urtica dioica</i>                                                                                                                     | JQ977713              | (3)                                 |
| Slovenia, Croatia,<br>Italy     | HO-Ud-S2              | <i>H. obsoletus</i> collected on<br><i>U. dioica</i>                                                                                     | JQ977714              | (3)                                 |
| Slovenia, Croatia,<br>Italy     | HO-Ud-S3              | <i>H. obsoletus</i> collected on<br><i>U. dioica</i>                                                                                     | JQ977715              | (3)                                 |
| Italy                           | HO-Ud-S4              | <i>U. dioica</i>                                                                                                                         | JQ977716              | (3)                                 |
| Italy                           | HO-Ud-S5              | <i>H. obsoletus</i> collected on<br><i>U. dioica</i>                                                                                     | JQ977717              | (3)                                 |
| Italy                           | HO-Ud-S6              | <i>H. obsoletus</i> collected on<br><i>U. dioica</i>                                                                                     | JQ977718              | (3)                                 |
| Slovenia                        | HO-Ud-S7              | <i>H. obsoletus</i> collected on<br><i>U. dioica</i>                                                                                     | JQ977719              | (3)                                 |
| Germany                         | LA6_I_C               | <i>H. obsoletus</i> collected on<br><i>Convolvulus arvensis</i>                                                                          | JQ977720              | (3)                                 |
| Serbia                          | Rpm35                 | <i>Reptalus panzeri</i><br>collected on <i>Zea mais</i>                                                                                  | KC703015              | (4)                                 |
| Serbia                          | Vv12_Kn6              | <i>V. vinifera</i> cv. Zweigelt                                                                                                          | KC703017              | (4)                                 |
| Serbia                          | Rqg50                 | <i>R. quinquecostatus</i><br>collected on <i>V. vinifera</i>                                                                             | KC703019              | (4)                                 |
| Austria                         | CrHo12_650-<br>St_At1 | <i>H. obsoletus</i> inoculated<br><i>C. roseus</i>                                                                                       | KJ469716              | (5)                                 |
| Austria                         | Vv12_274-St_At2       | <i>V. vinifera</i>                                                                                                                       | KJ469717              | (5)                                 |



|                        |                     |                                                                                             |           |     |
|------------------------|---------------------|---------------------------------------------------------------------------------------------|-----------|-----|
| Austria                | Ho13_1006-St_At3    | <i>H. obsoletus</i>                                                                         | KJ469718  | (5) |
| Austria                | CrHo13_1183 St_At4  | <i>H. obsoletus</i> inoculated<br><i>C. roseus</i>                                          | KJ469719  | (5) |
| Austria                | Ho13_838 St_At5     | <i>H. obsoletus</i>                                                                         | KJ469720  | (5) |
| Austria                | CrHo12 St_At6_601   | <i>H. obsoletus</i> inoculated<br><i>C. roseus</i>                                          | KJ469721  | (5) |
| Austria                | CrAr12_722_2 St_At7 | <i>V. vinifera</i> , <i>H. obsoletus</i><br>inoculated <i>C. roseus</i> , <i>R. panzeri</i> | KJ469722  | (5) |
| Austria                | Vv12_751 St_At8     | <i>V. vinifera</i>                                                                          | KJ469723  | (5) |
| Austria                | Vv12_Kn6 St_At9     | <i>V. vinifera</i>                                                                          | KJ469724  | (5) |
| Bosnia and Herzegovina | 3-11                | <i>V. vinifera</i>                                                                          | KP739850  | (5) |
| Bosnia and Herzegovina | 30-09               | <i>V. vinifera</i>                                                                          | KP739851  | (5) |
| Bosnia and Herzegovina | G21-13              | <i>V. vinifera</i>                                                                          | KP739856  | (5) |
| Italy                  | Vercer-Marche       | <i>V. vinifera</i>                                                                          | KJ145375  | (6) |
| Italy                  | P49-Marche          | <i>V. vinifera</i>                                                                          | KJ145376  | (6) |
| Italy                  | GA4-Abruzzi         | <i>V. vinifera</i>                                                                          | KJ145377  | (6) |
| Italy                  | B1-Campania         | <i>V. vinifera</i>                                                                          | KJ145378  | (6) |
| Italy                  | P46-Marche          | <i>V. vinifera</i>                                                                          | KJ145379  | (6) |
| Italy                  | A16-Abruzzi         | <i>V. vinifera</i>                                                                          | KJ145380  | (6) |
| Italy                  | TE7-Abruzzi         | <i>V. vinifera</i>                                                                          | KJ145381  | (6) |
| Italy                  | CA21-Marche         | <i>V. vinifera</i>                                                                          | KJ145382  | (6) |
| Italy                  | AQ1-Abruzzi         | <i>V. vinifera</i>                                                                          | KJ145383  | (6) |
| Italy                  | DXSAIN-Marche       | <i>V. vinifera</i>                                                                          | KJ145384  | (6) |
| Italy                  | CIL-Marche          | <i>V. vinifera</i>                                                                          | KJ145385  | (6) |
| Italy                  | TE17-Abruzzi        | <i>V. vinifera</i>                                                                          | KJ145386  | (6) |
| Italy                  | A25- Abruzzi        | <i>V. vinifera</i>                                                                          | KJ145387  | (6) |
| Italy                  | AQ29- Abruzzi       | <i>V. vinifera</i>                                                                          | KJ145388  | (6) |
| Georgia                | Carv1               | <i>V. vinifera</i>                                                                          | KT184879  | (7) |
| Georgia                | Carv2               | <i>V. vinifera</i>                                                                          | KT184880  | (7) |
| Georgia                | Char7               | <i>V. vinifera</i>                                                                          | KT184881  | (7) |
| Georgia                | Char8               | <i>V. vinifera</i>                                                                          | KT184882  | (7) |
| Georgia                | Amla77              | <i>V. vinifera</i>                                                                          | KT184883  | (7) |
| Georgia                | Sabu84              | <i>V. vinifera</i>                                                                          | KT184884  | (7) |
| Georgia                | Tsol89              | <i>V. vinifera</i>                                                                          | KT184885  | (7) |
| Azerbaijan             | AZ_GR05-2015        | <i>V. vinifera</i>                                                                          | LT899730- | (8) |
| Azerbaijan             | AZ_GR21-14          | <i>V. vinifera</i>                                                                          | LT899734- | (8) |
| Azerbaijan             | AZ_GR23-14          | <i>V. vinifera</i>                                                                          | LT899735  | (8) |
| Azerbaijan             | AZ_GR24-14          | <i>V. vinifera</i>                                                                          | LT899736  | (8) |
| Azerbaijan             | AZ13-H05            | <i>H. obsoletus</i> collected on<br><i>C. arvensis</i>                                      | LT899738- | (8) |
| Azerbaijan             | AZ13-H40            | <i>H. obsoletus</i> collected on<br><i>C. arvensis</i>                                      | LT899749  | (8) |
| Azerbaijan             | AZ2007_AUB3         | <i>Solanum melongena</i>                                                                    | LT899753- | (8) |
| Azerbaijan             | AZ2007_PV1          | <i>C. annuum</i>                                                                            | LT899754  | (8) |
| Azerbaijan             | AZ2008_TO41         | <i>S. lycopersicum</i>                                                                      | LT899756  | (8) |

## References

1. Boudon-Padiou E, Cousin MT. 1999. Yellow decline of *Lavandula hybrida* Rev and *L. vera* DC. International Journal of Tropical Plant Diseases 17:1-34.
2. Fabre A, Danet J-L, Foissac X. 2011. The stolbur phytoplasma antigenic membrane protein gene stamp is submitted to diversifying positive selection. Gene 472:37-41.
3. Johannesen J, Foissac X, Kehrl P, Maixner M. 2012. Impact of Vector Dispersal and Host-Plant Fidelity on the Dissemination of an Emerging Plant Pathogen. Plos One 7.
4. Cvrkovic T, Jovic J, Mitrovic M, Krstic O, Tosevski I. 2014. Experimental and molecular evidence of *Reptalus panzeri* as a natural vector of bois noir. Plant Pathology 63:42-53.
5. Aryan A, Brader G, Mörter J, Pastar M, Riedle-Bauer M. 2014. An abundant 'Candidatus Phytoplasma solani' tuf b strain is associated with grapevine, stinging nettle and *Hyalesthes obsoletus*. European Journal of Plant Pathology 140:213-227.
6. Murolo S, Romanazzi G. 2015. In-vineyard population structure of 'Candidatus Phytoplasma solani' using multilocus sequence typing analysis. Infection Genetics and Evolution 31:221-230.
7. Quaglino F, Maghradze D, Casati P, Chkhaidze N, Lobjanidze M, Ravasio A, Passera A, Venturini G, Failla O, Bianco PA. 2016. Identification and characterization of new 'Candidatus Phytoplasma solani' strains associated with Bois noir disease in *Vitis vinifera* L. cultivars showing a range of symptom severity in Georgia, the Caucasus region. Plant Disease 100:904-915.
8. Balakishiyeva G, Bayramova J, Mammadov A, Salar P, Danet JL, Ember I, Verdin E, Foissac X, Huseynova I. 2018. Important genetic diversity of "Candidatus Phytoplasma solani" related strains associated with Bois noir grapevine yellows and planthoppers in Azerbaijan. European Journal of Plant Pathology 151:937-946.
